# Supplementary material
Source: Springer Nature journal article supplement (https://www.springermedizin.de/resource/supplementary/12957_2012_1257_MOESM2_ESM.pdf/9562844)

**Recurrence-Free Survival Rates (%)**

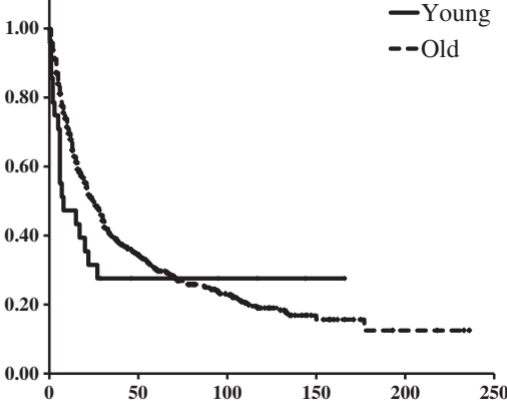

— Young  
-- Old

**Time from first hepatectomy (months)**

Supplement: MOESM2 [file 9562844]
